# Supplementary material for: Coinfection with chytrid genotypes drives divergent infection dynamics reflecting regional distribution patterns
Source: PubMed Central journal article supplement (PMC10502024; doi:10.1038/s42003-023-05314-y), 2023-09-14
Supplement: 42003_2023_5314_MOESM2_ESM.pdf [file 42003_2023_5314_MOESM2_ESM.pdf]

## **Supplementary Information Appendix**

### **Coinfection with chytrid genotypes drives divergent infection dynamics reflecting regional distribution patterns**

Tamilie Carvalho<sup>\*°</sup>, Daniel Medina<sup>°</sup>, Luisa P. Ribeiro, David Rodriguez, Thomas S. Jenkinson, C. Guilherme Becker, Luís Felipe Toledo<sup>°</sup>, Jessica Hite

<sup>\*</sup>To whom correspondence should be addressed: [tamilie@umich.edu](mailto:tamilie@umich.edu)

<sup>°</sup>These authors contributed equally.

### **Supplementary Result section:**

*Analysis assessing the effect of the variation in inoculum dose on metrics of genotype competitiveness, overall virulence and transmission potential.*

Initial pathogen dose contributed little to host life span, competitiveness, or transmission potential (all terms  $p > 0.05$ ). The initial pathogen dose did not significantly influence early pathogen establishment across all genotypes (gamma glm,  $F_{1,146} = 66.86$ ,  $p = 0.716$ ; Fig. 1A) nor when accounting for genotype-specific differences ( $F_{9,138} = 3.86$ ,  $p = 0.722$ ). Our results suggest that for the focal genotypes used here (P1 and P2), each additional increase in initial pathogen dose increased pathogen establishment by approximately  $2.445^{-07}$  zoospores<sup>-mL</sup>. Across all pathogen genotypes, the initial exposure also dose did not significantly influence host life span (gamma glm, mean day of death,  $F_{1,55} = 1,742$ ,  $p = 0.318$ ; Fig. 1B) nor when accounting for genotype-specific differences ( $F_{4,52} = 560.2$ ,  $p = 0.340$ ). This result suggests that an additional increase in initial pathogen dose increased host mortality by  $-1.831^{-07}$  days<sup>-individual</sup>. Lastly, across all genotypes, the initial pathogen dose did not significantly influence transmission potential (total pathogen load; gamma glm,  $F_{1,148} = 838$ ,  $p = 0.318$ ; Fig. 1C), nor were there genotype-specific differences (gamma glm,  $F_{9,140} = 4,845$ ,  $p = 0.913$ ).

**Supplementary Table 1.** Overview of coinfection experiments illustrating typical experimental designs of either holding pathogen dose constant or increasing pathogen dose (and virulence) during coinfection assays.

| Number | Authors           | Year | Journal                          | Same pathogen species? | Coinfection dose constant?                                                       | DOI                                        |
|--------|-------------------|------|----------------------------------|------------------------|----------------------------------------------------------------------------------|--------------------------------------------|
| 1      | Ramsay and Rohr   | 2022 | Journal of Applied Ecology       | Yes                    | Yes, of the focal strain, but examined a range of doses for 'coinfecting' strain | doi.org/10.1111/1365-2664.14332            |
| 2      | de Roode et al.   | 2005 | The American Naturalist          | Yes                    | No                                                                               | doi.org/10.1086/491659                     |
| 3      | Ben-Ami et al.    | 2008 | Evolution                        | Yes                    | No                                                                               | doi.org/10.1111/j.1558-5646.2008.00391.x   |
| 4      | Ge et al.         | 2012 | Virology                         | No                     | Yes                                                                              | doi.org/10.1186/1743-422X-9-128            |
| 5      | Niczyporuk et al. | 2014 | Pol J Vet Sci                    | Yes                    | Yes, of the focal strain but examined a range of doses for 'coinfecting' strain  | doi.org/10.2478/pjvs-2014-0001             |
| 6      | Bell et al.       | 2006 | Evolution                        | Yes                    | No                                                                               | doi.org/10.1111/j.0014-3820.2006.tb01215.x |
| 7      | Blaustein et al.  | 2018 | Diversity                        | Yes                    | Variable                                                                         | doi.org/10.3390/d10030081                  |
| 8      | Jenkinson et al.  | 2018 | Proc B                           | Yes                    | No                                                                               | doi.org/10.6084/m9.figshare.c.4320824.v1   |
| 9      | Thompson et. al.  | 2017 | Scientific Reports               | Yes                    | Yes                                                                              | doi.org/10.1038/s41598-017-00835-z         |
| 10     | Gipson et. al.    | 2019 | Evolution                        | Yes                    | Yes                                                                              | doi.org/10.1111/evo.13760                  |
| 11     | Ben-Ami et al.    | 2011 | J. Evolutionary Biology          | No                     | No                                                                               | doi.org/10.1111/j.1420-9101.2011.02264.x   |
| 12     | Seppalla et al.   | 2012 | The American Naturalist          | Both                   | Both                                                                             | doi.org/10.1086/666985                     |
| 13     | Taylor et al.     | 1997 | Proc B                           | Yes                    | No                                                                               | doi.org/10.1098/rspb.1997.0128             |
| 14     | Clay et al.       | 2019 | The American Naturalist          | No                     | No                                                                               | doi.org/10.1086/701126                     |
| 15     | Clay et al.       | 2020 | Proc B                           | No                     | No                                                                               | doi.org/10.1098/rspb.2020.0046             |
| 16     | deRoode et al.    | 2005 | PNAS                             | Yes                    | No                                                                               | doi.org/10.1073/pnas.05000781              |
| 17     | Karvonen et al.   | 2011 | Proc B                           | Yes                    | Yes                                                                              | doi.org/10.1098/rspb.2011.0879             |
| 18     | Klemme et al.     | 2016 | Journal of Animal Ecology        | Yes                    | Yes                                                                              | doi.org/10.1111/1365-2656.12472            |
| 19     | Susi et al.       | 2015 | Nature Communications            | Yes                    | Yes                                                                              | doi.org/10.1038/ncomms6975                 |
| 20     | Kinnula et al.    | 2017 | BMC Evol Biol                    | Yes                    | Yes                                                                              | doi.org/10.1186/s12862-017-0922-2          |
| 21     | Longo et al.      | 2019 | Biological Invasions             | No                     | Yes                                                                              | doi.org/10.1007/s10530-019-01973-3         |
| 22     | Friday at a.      | 2020 | J Exp Zool A Ecol Integr Physiol | No                     | Yes                                                                              | doi.org/10.1002/jez.2427                   |

**Supplementary Table 2.** Treatment groups of the infection assay with five different genotypes of the fungus *Batrachochytrium dendrobatidis* (Bd), which included single-genotype and mixed genotype exposures with either two or three genotypes in all possible combinations, and a control group. Designations (panzootic ‘P’, enzootic ‘E’ and hybrid ‘H’), number of hosts per treatment, and chytrid lineages or genotype.

| Treatment Groups | n  | Lineages or genotype               |
|------------------|----|------------------------------------|
| P1               | 16 | Bd-GPL                             |
| P2               | 16 | Bd-GPL                             |
| E1               | 16 | Bd-Asia-2/Brazil                   |
| E2               | 16 | Bd-Asia-2/Brazil                   |
| H                | 16 | Hybrid                             |
| P1 + E1          | 15 | Bd-GPL + Bd-Asia-2/Brazil          |
| P1 + E2          | 15 | Bd-GPL + Bd-Asia-2/Brazil          |
| P1 + H           | 14 | Bd-GPL + Hybrid                    |
| P2 + E1          | 14 | Bd-GPL + Bd-Asia-2/Brazil          |
| P2 + E2          | 16 | Bd-GPL + Bd-Asia-2/Brazil          |
| P2 + H           | 15 | Bd-GPL + Hybrid                    |
| P1 + E1 + H      | 16 | Bd-GPL + Bd-Asia-2/Brazil + Hybrid |
| P1 + E2 + H      | 16 | Bd-GPL + Bd-Asia-2/Brazil + Hybrid |
| P2 + E1 + H      | 16 | Bd-GPL + Bd-Asia-2/Brazil + Hybrid |
| P2 + E2 + H      | 16 | Bd-GPL + Bd-Asia-2/Brazil + Hybrid |
| Control          | 32 | Control                            |

**Supplementary Table 3.** Applied Biosystems assay information for BdSC9\_621917\_AC (Assay ID AHBKG6X) at 40X concentration.

| Primer/Probe   | Sequence                     | Concentration<br>( $\mu$ M) | Reporter | Quencher |
|----------------|------------------------------|-----------------------------|----------|----------|
| Forward primer | GAGCTGGCCTTTCTCTTGAGA        | 36                          | -        | -        |
| Reverse primer | CGTAGAATAAGAAGACATTGCACTTGGT | 36                          | -        | -        |
| Reporter 1     | AGATCAAAATGGTCACTCAT         | 8                           | VIC      | NFQ      |
| Reporter 2     | CAAAATGGGCACTCAT             | 8                           | FAM      | NFQ      |

**Supplementary Table 4.** Standard curve parameters for assay Bdm<sub>t</sub>\_26360\_AC, when 1.34E-5 ng/μl, 1.34E-4 ng/μl, 0.00134 ng/μl, 0.0134 ng/μl, 0.134 ng/μl of DNA were used as input for strains BAF01 (Bd-Asia-2/Brazil), NAF01 (Bd-GPL), and CLFT024-02 (hybrid). Reactions were run in triplicate.

| Reporter | Allele | Target genome | Slope   | Y-intercept | R <sup>2</sup> | Efficiency (%) | Std. dev. | Std. error |
|----------|--------|---------------|---------|-------------|----------------|----------------|-----------|------------|
| FAM      | A      | BAF 01        | -3.4276 | 20.5516     | 0.9984         | 95.7714        | 0.0330    | 0.0506     |
| VIC      | G      | NAF 01        | -3.2988 | 21.4904     | 0.9930         | 100.9743       | 0.1757    | 0.0765     |
| VIC      | G      | CLFT 024-02   | -3.4318 | 20.2440     | 0.9992         | 95.6105        | 0.0192    | 0.0377     |

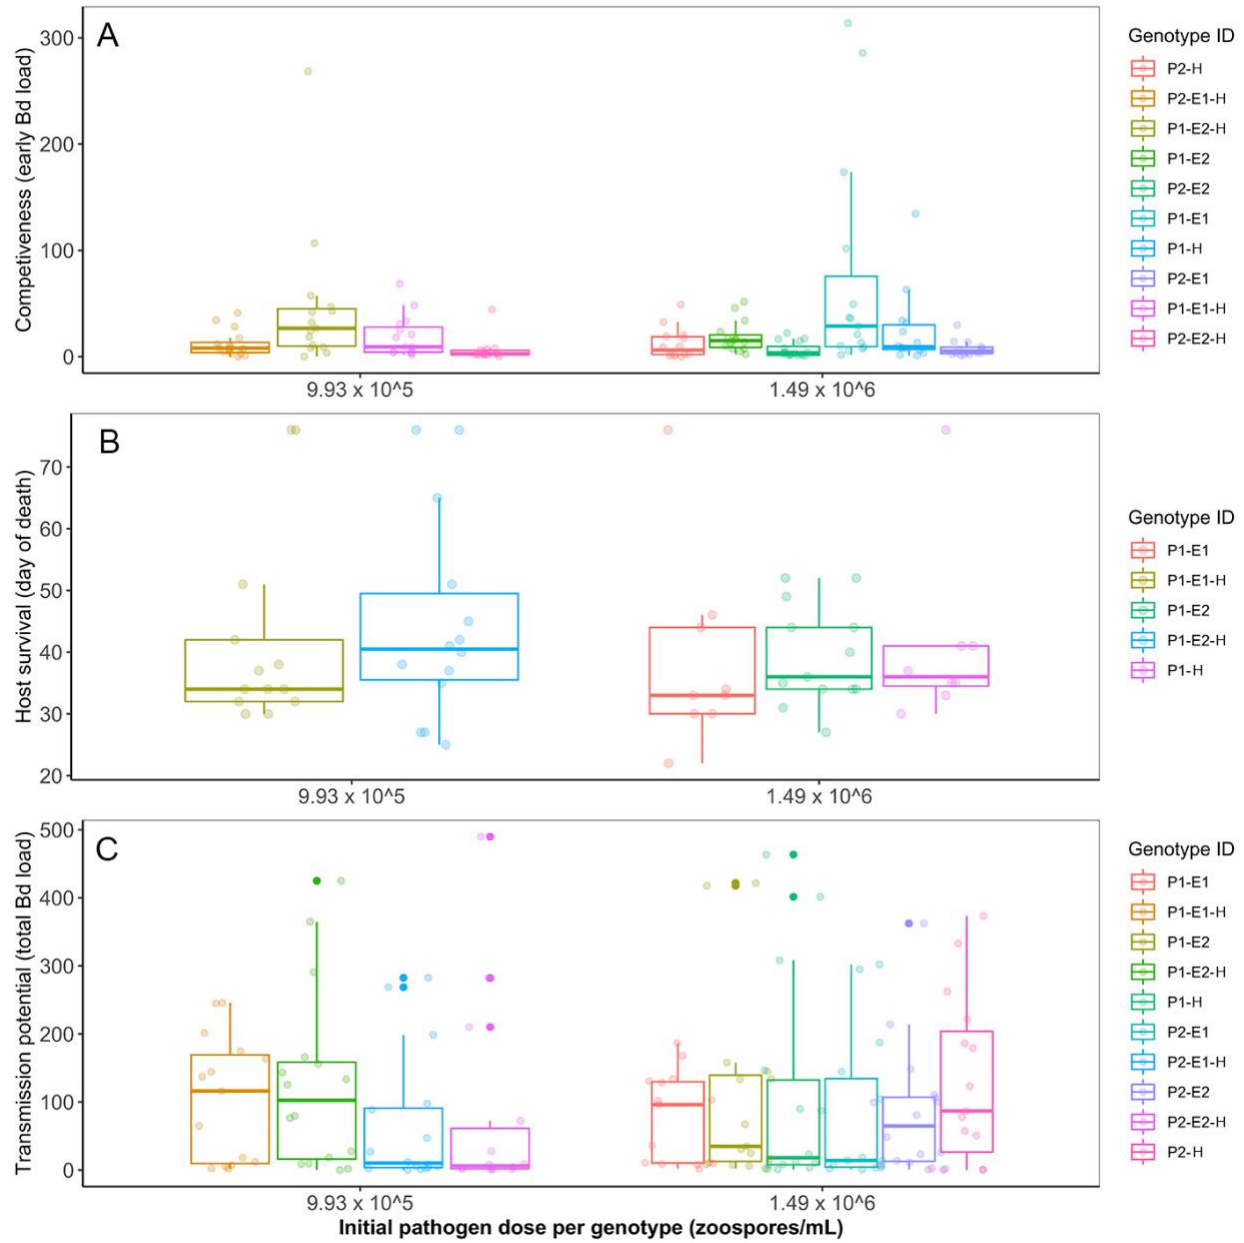

**Supplementary Figure 1.** The initial pathogen dose did not significantly influence competitiveness (early pathogen establishment (A), host survival (B) and transmission potential (C). Exposure treatments associated with pathogen doses  $9.93 \times 10^5$  and  $1.49 \times 10^6$  represent triple and double infections, respectively. Data represent the median, upper and lower quartile, and maximum and minimum values. Infection loads are represented by Bd concentration in  $\text{pg}/\mu\text{l}$ .

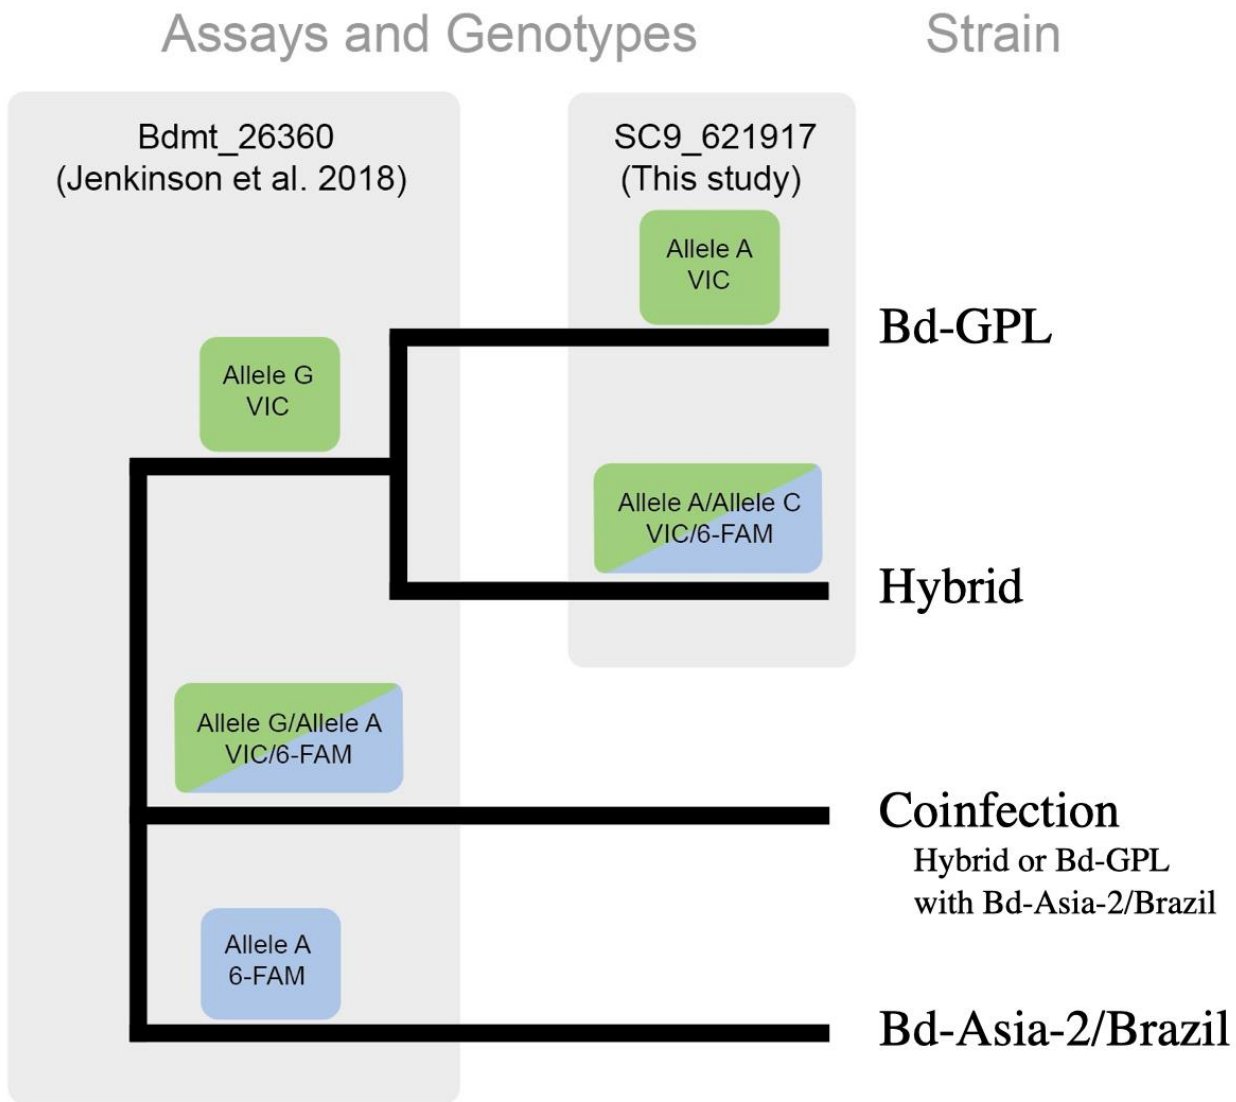

**Supplementary Figure 2.** Diagram of diagnostic genotyping assays used in this study.



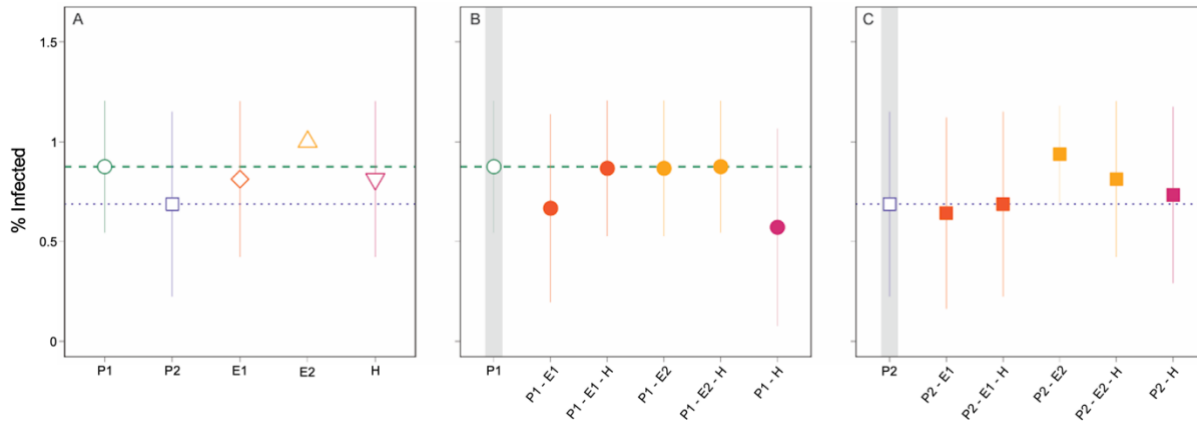

**Supplementary Figure 3.** The presence of multiple genotypes did not affect the proportion of hosts infected (Binomial GLM, all  $p$ -values  $> 0.05$ ). Gray bars highlight single-genotype infections. These results serve as a quality control metric and clarify that our infection methodology was consistent across treatments.
