# Supplementary material for: Coinfection with chytrid genotypes drives divergent infection dynamics reflecting regional distribution patterns
Source: PubMed Central journal article supplement (PMC10502024; doi:10.1038/s42003-023-05314-y), 2023-09-14
Supplement: 42003_2023_5314_MOESM3_ESM.pdf [file 42003_2023_5314_MOESM3_ESM.pdf]

## Description of Additional Supplementary Files

**File name:** Supplementary Data 1

**Description:** Sequence data in fasta format used to explore the phylogenetic relationships between the *Batrachochytrium dendrobatidis* (Bd) isolates used in this study.

**File name:** Supplementary Data 2

**Description:** *Batrachochytrium dendrobatidis* (Bd) genotypes isolated from amphibians across Brazilian Atlantic Forest. This table includes isolate name or museum record of the host, host species, sampled host life-stage (tadpole or adult) and breeding habitat, collector name, isolation year, chytrid lineage or genotype, municipality, Brazilian state, latitude (Lat), longitude (Lon), and reference.
